# Supplementary material for: Neighbourhood wealth, not urbanicity, predicts prosociality towards strangers
Source: PubMed Central journal article supplement (PMC7657855; doi:10.1098/rspb.2020.1359), 2020-10-07
Supplement: rspb20201359_review_history.pdf [file rspb20201359_review_history.pdf]

## Neighbourhood wealth, not urbanicity, predicts prosociality towards strangers

Elena Zwirner and Nichola Raihani

### Article citation details

*Proc. R. Soc. B* **287**: 20201359.

<http://dx.doi.org/10.1098/rspb.2020.1359>

### Review timeline

Original submission: 10 June 2020  
Revised submission: 10 September 2020  
Final acceptance: 14 September 2020

Note: Reports are unedited and appear as submitted by the referee. The review history appears in chronological order.

## Review History

### RSPB-2020-1359.R0 (Original submission)

Review form: Reviewer 1 (Kimmo Eriksson)

#### Recommendation

Accept with minor revision (please list in comments)

**Scientific importance: Is the manuscript an original and important contribution to its field?**  
Excellent

**General interest: Is the paper of sufficient general interest?**  
Excellent

**Quality of the paper: Is the overall quality of the paper suitable?**  
Good

**Is the length of the paper justified?**  
Yes

**Should the paper be seen by a specialist statistical reviewer?**  
Yes

**Do you have any concerns about statistical analyses in this paper? If so, please specify them explicitly in your report.**

Yes

**It is a condition of publication that authors make their supporting data, code and materials available - either as supplementary material or hosted in an external repository. Please rate, if applicable, the supporting data on the following criteria.**

**Is it accessible?**

No

**Is it clear?**

N/A

**Is it adequate?**

N/A

**Do you have any ethical concerns with this paper?**

No

### **Comments to the Author**

This paper reports field experiments on prosocial behavior: posting letters, helping with dropped items, and stopping to let someone cross the road. The experiments were carried out across locations in the UK. The locations were selected to vary across two dimensions: urbanicity (cities vs. towns) and affluence (high wealth vs. low wealth). The authors examined how these dimensions influenced the rate of prosocial behavior and found a significant and substantial positive effect of affluence but no effect of urbanicity. Overall this is a good paper with very interesting results. I have only a few issues with it that I hope should be easily fixed.

1. It is surprising that the title does not include the positive finding but only the negative finding.
2. Similarly in the abstract it is not clear that your study was designed explicitly to test both the urbanicity and affluence hypotheses.
3. After reading the abstract I did not understand that these were proper field experiments and not survey experiments (which may also be considered "real-world" as opposed to econ lab games). I don't think you measured "willingness", you measured actual behavior. Do not undersell this strength of your study.
4. The crucial weakness of the current manuscript is the poor description of the statistical analysis. I think Fig 2 is lovely and compellingly illustrates the results. But the meaning of the values in Fig 1 is beyond me and I wonder if even the authors know what it is; at least, I found no attempt to explain what the unit of the values is. This goes for the text too: what does it mean that the effect of affluence was estimated to 0.82? Moreover, what does an "89 % interval" mean? Only much later in the paper do you mention that you use a Bayesian approach, but this must be explained much earlier and in sufficient detail (including prior distributions) for readers to decode your results. And you need to write out the full logistic regression equation so that readers can understand what you are in fact estimating.
5. To be publishable, I think the discussion section must heads-on address and attempt to reconcile your findings of greater prosociality in affluence neighborhoods with the body of research, reviewed by Piff and Robinson (which you cite), finding more prosocial behavior in the lower social class. I guess most of their research is US based; could it be that your finding is specific to the UK and would not replicate in the US? I also guess most of their research is on giving experiments and not on real-life behavior in different neighborhoods; could it be that the

crucial parameter in your experiment is not who but where, that is, that the same individuals behave differently depending of whether they are in a rich or deprived neighborhood?

## Review form: Reviewer 2

### **Recommendation**

Accept with minor revision (please list in comments)

**Scientific importance: Is the manuscript an original and important contribution to its field?**

Excellent

**General interest: Is the paper of sufficient general interest?**

Excellent

**Quality of the paper: Is the overall quality of the paper suitable?**

Excellent

**Is the length of the paper justified?**

Yes

**Should the paper be seen by a specialist statistical reviewer?**

Yes

**Do you have any concerns about statistical analyses in this paper? If so, please specify them explicitly in your report.**

No

**It is a condition of publication that authors make their supporting data, code and materials available - either as supplementary material or hosted in an external repository. Please rate, if applicable, the supporting data on the following criteria.**

**Is it accessible?**

Yes

**Is it clear?**

Yes

**Is it adequate?**

Yes

**Do you have any ethical concerns with this paper?**

No

### **Comments to the Author**

The authors set out to examine an interesting question, exploring whether prosocial tendencies of humans are better explained by whether they live in a town or a city, or by the deprivation level of the neighborhood they live in. Additionally, the authors look whether a direct or indirect request to help increases prosocial behaviors, and whether being in a group or being alone in- or decreased helping behavior.

Overall, I think this is a really interesting study, which seems to be of high scientific value, and is nicely written. Thus, I recommend to accept this paper for publication with only asking for a few

minor revisions:

- In the introduction, the authors give a good overview of the literature investigating the factors city/town and deprivation, however, the literature overview for the factors population density, indirect/direct request, and alone/group is rather spare. I would suggest the authors to give some background for all predictors they are investigating.
- I think the analysis reported deserves some more details. It is not clear from the main manuscript which factors exactly were entered in the model. Where there any interactions that were of interest? Can you explain the steps of the analysis in more detail?

## Decision letter (RSPB-2020-1359.R0)

04-Sep-2020

Dear Professor Raihani:

Your manuscript has now been peer reviewed and the reviews have been assessed by an Associate Editor. The reviewers' comments (not including confidential comments to the Editor) and the comments from the Associate Editor are included at the end of this email for your reference. As you will see, the reviewers and the Editors have raised some concerns with your manuscript and we would like to invite you to revise your manuscript to address them.

We do not allow multiple rounds of revision so we urge you to make every effort to fully address all of the comments at this stage. If deemed necessary by the Associate Editor, your manuscript will be sent back to one or more of the original reviewers for assessment. If the original reviewers are not available we may invite new reviewers. Please note that we cannot guarantee eventual acceptance of your manuscript at this stage.

To submit your revision please log into <http://mc.manuscriptcentral.com/prsb> and enter your Author Centre, where you will find your manuscript title listed under "Manuscripts with Decisions." Under "Actions", click on "Create a Revision". Your manuscript number has been appended to denote a revision.

When submitting your revision please upload a file under "Response to Referees" - in the "File Upload" section. This should document, point by point, how you have responded to the reviewers' and Editors' comments, and the adjustments you have made to the manuscript. We require a copy of the manuscript with revisions made since the previous version marked as 'tracked changes' to be included in the 'response to referees' document.

Your main manuscript should be submitted as a text file (doc, txt, rtf or tex), not a PDF. Your figures should be submitted as separate files and not included within the main manuscript file.

When revising your manuscript you should also ensure that it adheres to our editorial policies (<https://royalsociety.org/journals/ethics-policies/>). You should pay particular attention to the following:

Research ethics:

If your study contains research on humans please ensure that you detail in the methods section whether you obtained ethical approval from your local research ethics committee and gained informed consent to participate from each of the participants.

Use of animals and field studies:

If your study uses animals please include details in the methods section of any approval and licences given to carry out the study and include full details of how animal welfare standards were ensured. Field studies should be conducted in accordance with local legislation; please include details of the appropriate permission and licences that you obtained to carry out the field work.

Data accessibility and data citation:

It is a condition of publication that you make available the data and research materials supporting the results in the article. Please see our Data Sharing Policies (<https://royalsociety.org/journals/authors/author-guidelines/#data>). Datasets should be deposited in an appropriate publicly available repository and details of the associated accession number, link or DOI to the datasets must be included in the Data Accessibility section of the article (<https://royalsociety.org/journals/ethics-policies/data-sharing-mining/>). Reference(s) to datasets should also be included in the reference list of the article with DOIs (where available).

In order to ensure effective and robust dissemination and appropriate credit to authors the dataset(s) used should also be fully cited and listed in the references.

If you wish to submit your data to Dryad (<http://datadryad.org/>) and have not already done so you can submit your data via this link [http://datadryad.org/submit?journalID=RSPB&manu=\(Document not available\)](http://datadryad.org/submit?journalID=RSPB&manu=(Document not available)), which will take you to your unique entry in the Dryad repository.

If you have already submitted your data to dryad you can make any necessary revisions to your dataset by following the above link.

For more information please see our open data policy <http://royalsocietypublishing.org/data-sharing>.

Electronic supplementary material:

All supplementary materials accompanying an accepted article will be treated as in their final form. They will be published alongside the paper on the journal website and posted on the online figshare repository. Files on figshare will be made available approximately one week before the accompanying article so that the supplementary material can be attributed a unique DOI. Please try to submit all supplementary material as a single file.

Online supplementary material will also carry the title and description provided during submission, so please ensure these are accurate and informative. Note that the Royal Society will not edit or typeset supplementary material and it will be hosted as provided. Please ensure that the supplementary material includes the paper details (authors, title, journal name, article DOI). Your article DOI will be 10.1098/rspb.[paper ID in form xxxx.xxxx e.g. 10.1098/rspb.2016.0049].

Please submit a copy of your revised paper within three weeks. If we do not hear from you within this time your manuscript will be rejected. If you are unable to meet this deadline please let us know as soon as possible, as we may be able to grant a short extension.

Thank you for submitting your manuscript to Proceedings B; we look forward to receiving your revision. If you have any questions at all, please do not hesitate to get in touch.

Best wishes,  
Dr John Hutchinson, Editor  
<mailto:proceedingsb@royalsociety.org>

Associate Editor

Board Member: 1

Comments to Author:

This paper reports the results of real-world experiments measuring willingness to cooperate. Real world experiments are rare and hard to conduct. It is extremely interesting, well executed and well explained and in my view will be of interest to a broad audience. I agree with the reviewers, however, that the statistical analysis needs more explanation, and a title change might emphasise the novelty of the results.

Reviewer(s)' Comments to Author:

Referee: 1

Comments to the Author(s)

This paper reports field experiments on prosocial behavior: posting letters, helping with dropped items, and stopping to let someone cross the road. The experiments were carried out across locations in the UK. The locations were selected to vary across two dimensions: urbanicity (cities vs. towns) and affluence (high wealth vs. low wealth). The authors examined how these dimensions influenced the rate of prosocial behavior and found a significant and substantial positive effect of affluence but no effect of urbanicity. Overall this is a good paper with very interesting results. I have only a few issues with it that I hope should be easily fixed.

1. It is surprising that the title does not include the positive finding but only the negative finding.
2. Similarly in the abstract it is not clear that your study was designed explicitly to test both the urbanicity and affluence hypotheses.
3. After reading the abstract I did not understand that these were proper field experiments and not survey experiments (which may also be considered "real-world" as opposed to econ lab games). I don't think you measured "willingness", you measured actual behavior. Do not undersell this strength of your study.
4. The crucial weakness of the current manuscript is the poor description of the statistical analysis. I think Fig 2 is lovely and compellingly illustrates the results. But the meaning of the values in Fig 1 is beyond me and I wonder if even the authors know what it is; at least, I found no attempt to explain what the unit of the values is. This goes for the text too: what does it mean that the effect of affluence was estimated to 0.82? Moreover, what does an "89 % interval" mean? Only much later in the paper do you mention that you use a Bayesian approach, but this must be explained much earlier and in sufficient detail (including prior distributions) for readers to decode your results. And you need to write out the full logistic regression equation so that readers can understand what you are in fact estimating.
5. To be publishable, I think the discussion section must heads-on address and attempt to reconcile your findings of greater prosociality in affluence neighborhoods with the body of research, reviewed by Piff and Robinson (which you cite), finding more prosocial behavior in the lower social class. I guess most of their research is US based; could it be that your finding is specific to the UK and would not replicate in the US? I also guess most of their research is on giving experiments and not on real-life behavior in different neighborhoods; could it be that the crucial parameter in your experiment is not who but where, that is, that the same individuals behave differently depending of whether they are in a rich or deprived neighborhood?

Referee: 2

Comments to the Author(s)

The authors set out to examine an interesting question, exploring whether prosocial tendencies of humans are better explained by whether they live in a town or a city, or by the deprivation level

of the neighborhood they live in. Additionally, the authors look whether a direct or indirect request to help increases prosocial behaviors, and whether being in a group or being alone in- or decreased helping behavior.

Overall, I think this is a really interesting study, which seems to be of high scientific value, and is nicely written. Thus, I recommend to accept this paper for publication with only asking for a few minor revisions:

- In the introduction, the authors give a good overview of the literature investigating the factors city/town and deprivation, however, the literature overview for the factors population density, indirect/direct request, and alone/group is rather sparse. I would suggest the authors to give some background for all predictors they are investigating.

- I think the analysis reported deserves some more details. It is not clear from the main manuscript which factors exactly were entered in the model. Where there any interactions that were of interest? Can you explain the steps of the analysis in more detail?

## Author's Response to Decision Letter for (RSPB-2020-1359.R0)

See Appendix A.

## Decision letter (RSPB-2020-1359.R1)

14-Sep-2020

Dear Professor Raihani

I am pleased to inform you that your manuscript entitled "Neighbourhood wealth, not urbanicity, predicts prosociality towards strangers" has been accepted for publication in Proceedings B. Congratulations!!

You can expect to receive a proof of your article from our Production office in due course, please check your spam filter if you do not receive it. PLEASE NOTE: you will be given the exact page length of your paper which may be different from the estimation from Editorial and you may be asked to reduce your paper if it goes over the 10 page limit.

If you are likely to be away from e-mail contact please let us know. Due to rapid publication and an extremely tight schedule, if comments are not received, we may publish the paper as it stands.

If you have any queries regarding the production of your final article or the publication date please contact [procb\\_proofs@royalsociety.org](mailto:procb_proofs@royalsociety.org)

### Open Access

You are invited to opt for Open Access, making your freely available to all as soon as it is ready for publication under a CCBY licence. Our article processing charge for Open Access is £1700.

Corresponding authors from member institutions

(<http://royalsocietypublishing.org/site/librarians/allmembers.xhtml>) receive a 25% discount to these charges. For more information please visit <http://royalsocietypublishing.org/open-access>.

Your article has been estimated as being 10 pages long. Our Production Office will be able to confirm the exact length at proof stage.

#### Paper charges

An e-mail request for payment of any related charges will be sent out after proof stage (within approximately 2-6 weeks). The preferred payment method is by credit card; however, other payment options are available

#### Electronic supplementary material:

All supplementary materials accompanying an accepted article will be treated as in their final form. They will be published alongside the paper on the journal website and posted on the online figshare repository. Files on figshare will be made available approximately one week before the accompanying article so that the supplementary material can be attributed a unique DOI.

Thank you for your fine contribution. On behalf of the Editors of the Proceedings B, we look forward to your continued contributions to the Journal.

Sincerely,

Dr John Hutchinson

Editor, Proceedings B

mailto: [proceedingsb@royalsociety.org](mailto:proceedingsb@royalsociety.org)

Associate Editor:

Comments to Author:

The authors have done an excellent job of responding to the referees' comments and the paper reads better, particularly the stats which required some extra detail. I like the title change and think this better reflects the findings. On the whole I really like this paper and am confident that the paper will reach a broad audience.



# Appendix A

## Responses to Reviewers

We would like to thank the Board Member and both editors for the extremely constructive feedback, which we have incorporated into the revised manuscript. This has been one of the most pleasant and genuinely helpful peer-review experiences that either of us has experienced. Thank you for that! We note all the point by point responses to the reviewer comments below, in blue. Excerpts from the revised manuscript are shown in red.

Associate Editor

Board Member: 1

Comments to Author:

This paper reports the results of real-world experiments measuring willingness to cooperate. Real world experiments are rare and hard to conduct. It is extremely interesting, well executed and well explained and in my view will be of interest to a broad audience. I agree with the reviewers, however, that the statistical analysis needs more explanation, and a title change might emphasise the novelty of the results.

Thanks for this – we have changed the title to:

“Neighbourhood wealth, not urbanicity, predicts prosociality towards strangers”

We have also added more explanation of the statistical methods (please see below).

Reviewer(s)' Comments to Author:

Referee: 1

Comments to the Author(s)

This paper reports field experiments on prosocial behavior: posting letters, helping with dropped items, and stopping to let someone cross the road. The experiments were carried out across locations in the UK. The locations were selected to vary across two dimensions: urbanicity (cities vs. towns) and affluence (high wealth vs. low wealth). The authors examined how these dimensions influenced the rate of prosocial behavior and found a significant and substantial positive effect of affluence but no effect of urbanicity. Overall this is a good paper with very interesting results. I have only a few issues with it that I hope should be easily fixed.

Thank you so much for the positive feedback.

1. It is surprising that the title does not include the positive finding but only the negative finding.

We have now changed the title as noted above.

2. Similarly in the abstract it is not clear that your study was designed explicitly to test both the urbanicity and affluence hypotheses.

We have added a line in the abstract as follows:

**However, it is not known whether a general tendency towards prosocial behaviour varies across the urban-rural gradient, or whether other factors such as neighbourhood wealth might be more predictive of variation in prosocial behaviour.**

3. After reading the abstract I did not understand that these were proper field experiments and not survey experiments (which may also be considered “real-world” as opposed to econ lab games). I don’t think you measured “willingness”, you measured actual behavior. Do not undersell this strength of your study.

Thanks for this – we re-worded the abstract slightly in line with your suggestion.

4. The crucial weakness of the current manuscript is the poor description of the statistical analysis. I think Fig 2 is lovely and compellingly illustrates the results. But the meaning of the values in Fig 1 is beyond me and I wonder if even the authors know what it is; at least, I found no attempt to explain what the unit of the values is. This goes for the text too: what does it mean that the effect of affluence was estimated to 0.82? Moreover, what does an “89 % interval” mean? Only much later in the paper do you mention that you use a Bayesian approach, but this must be explained much earlier and in sufficient detail (including prior distributions) for readers to decode your results. And you need to write out the full logistic regression equation so that readers can understand what you are in fact estimating.

Sorry about this – and you were completely right to point this out. A small part of the confusion stems from us having submitted a manuscript with the Intro, Results, Discussion, Methods format. We have now altered the manuscript so that Methods follow Intro as this is more conventional and easier to understand. In doing this, we removed some redundant information from the introduction that was repeated in the Methods.

However, you were also right that we did not present or explain the output of our models well. We originally presented the untransformed mean estimates from our model, which added to the confusion. We have now changed Figure 1 so that it shows the back-transformed means (which can be understood as binomial probabilities of receiving help). We have added more information in the statistical methods section (lines 225 – 244) to explain how the models were run, and the priors we chose. We have changed the results section so that we report the back-transformed posterior mean probabilities (lines 253-261). We also include far more text in the legend to Figure 1 (line 265-277) to explain how a reader should interpret the figure. We are also open to removing the figure if the reviewer and editor think that would be simpler, though we think it is helpful / interesting to show some of the regional variation in the probability of receiving help, which this figure illustrates. We would also like to note that all data and code to reproduce the analyses are available at <https://osf.io/cmdfk/>.

5. To be publishable, I think the discussion section must heads-on address and attempt to reconcile your findings of greater prosociality in affluence neighborhoods with the body of research, reviewed by Piff and Robinson (which you cite), finding more prosocial behavior in the lower social class. I guess most of their research is US based; could it be that your finding is specific to the UK and would not replicate in the US? I also guess most of their research is on giving experiments and not on real-life behavior in different neighborhoods; could it be that the crucial parameter in your experiment is not who but where, that is, that the same individuals behave differently depending of whether they are in a rich or deprived neighborhood?

Thanks for this suggestion. We have now added two more paragraphs in the discussion (lines 349 – 378) explicitly addressing this point. We agree that where the studies are conducted could affect helping behaviour in our tasks and we raise this possibility along with supporting literature. We also discuss in more detail the mixed pattern of results in this field more generally. We have also updated our literature review in this section to include some recently-published work.

Referee: 2

#### Comments to the Author(s)

The authors set out to examine an interesting question, exploring whether prosocial tendencies of humans are better explained by whether they live in a town or a city, or by the deprivation level of the neighborhood they live in. Additionally, the authors look whether a direct or indirect request to help increases prosocial behaviors, and whether being in a group or being alone in- or decreased helping behavior.

Overall, I think this is a really interesting study, which seems to be of high scientific value, and is nicely written. Thus, I recommend to accept this paper for publication with only asking for a few minor revisions:

Thank you so much for the positive feedback.

- In the introduction, the authors give a good overview of the literature investigating the factors city/town and deprivation, however, the literature overview for the factors population density, indirect/direct request, and alone/group is rather spare. I would suggest the authors to give some background for all predictors they are investigating.

Thank you for pointing this out. We have now included some additional text in the introduction (lines 65-77), methods (lines 138-141) to explain the justification for these factors, including supporting references. In addition, we report some new analyses to further explore the effects of direct request and audience presence on helping behaviour (lines 291-295 and 304-307). Furthermore, we also added some text to the discussion reporting on the effects of direct request and audience presence (lines 407-420).

- I think the analysis reported deserves some more details. It is not clear from the main manuscript which factors exactly were entered in the model. Where there any interactions that were of interest? Can you explain the steps of the analysis in more detail?

We completely agree with this critique. Please see the response to Reviewer 1 above where we describe the revisions we made. We would also like to note that all data and code to reproduce the analyses are available at <https://osf.io/cmdfk/>.
